# Supplementary material for: Li ion/vapor grown carbon fiber polymer actuators show higher performance than single-walled carbon nanotube polymer actuators
Source: Royal Society of Chemistry journal article supplement (doi:10.1039/c3ta13338a), 2013-10-22
Supplement: c3ta13338a.pdf [file c3ta13338a.pdf]

## Supplementary Data

**Title: Li ion / vapor grown carbon fiber polymer actuator with higher performance than single-walled carbon nanotube polymer actuator**

**Authors: Naohiro Terasawa,<sup>\*</sup> Ichiroh Takeuchi**

**Affiliation:**

Health Research Institute, National Institute of Advanced Industrial Science and Technology

(AIST), 1-8-31 Midorigaoka, Ikeda, Osaka 563-8577, Japan

Tel: +81-72-751-7914, Fax: +81-72-751-8370

E-mail: [terasawa-naohiro@aist.go.jp](mailto:terasawa-naohiro@aist.go.jp)

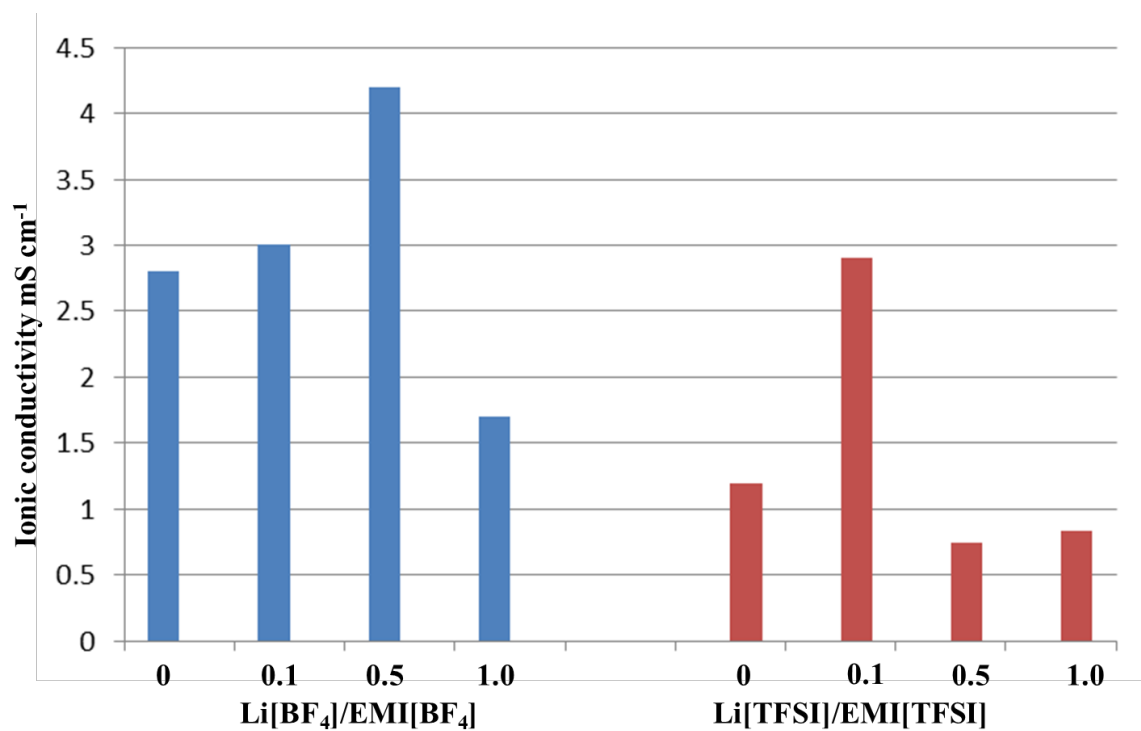

**Fig. S1** Ionic conductivities of gel electrolyte layers with different Li[BF<sub>4</sub>]/EMI[BF<sub>4</sub>] and Li[TFSI]/EMI[TFSI] molar ratios.

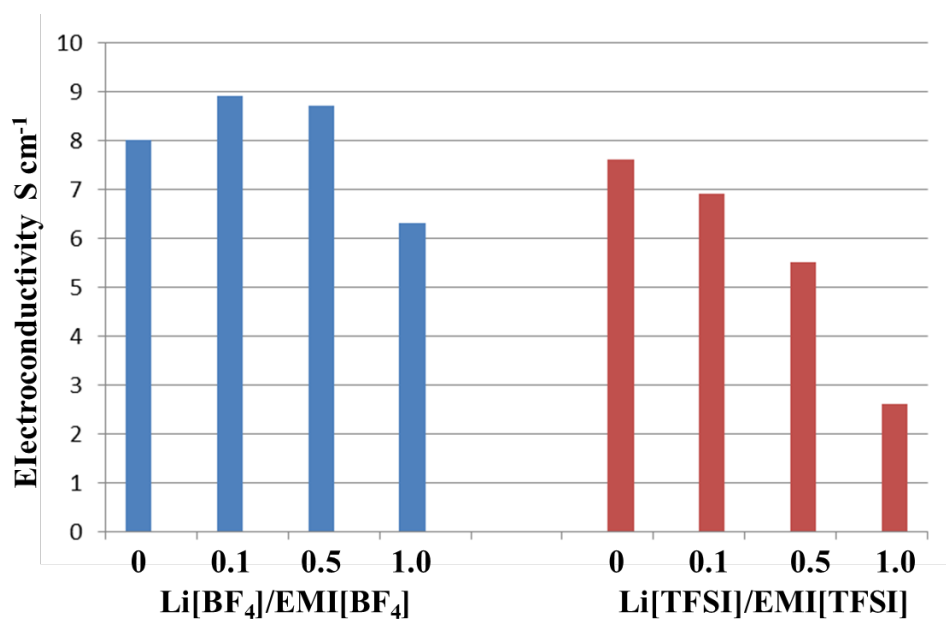

**Fig. S2** Electrical conductivity (S·cm<sup>-1</sup>) for polymer-supported electrode layers with different Li[BF<sub>4</sub>]/EMI[BF<sub>4</sub>] and Li[TFSI]/EMI[TFSI] molar ratios.

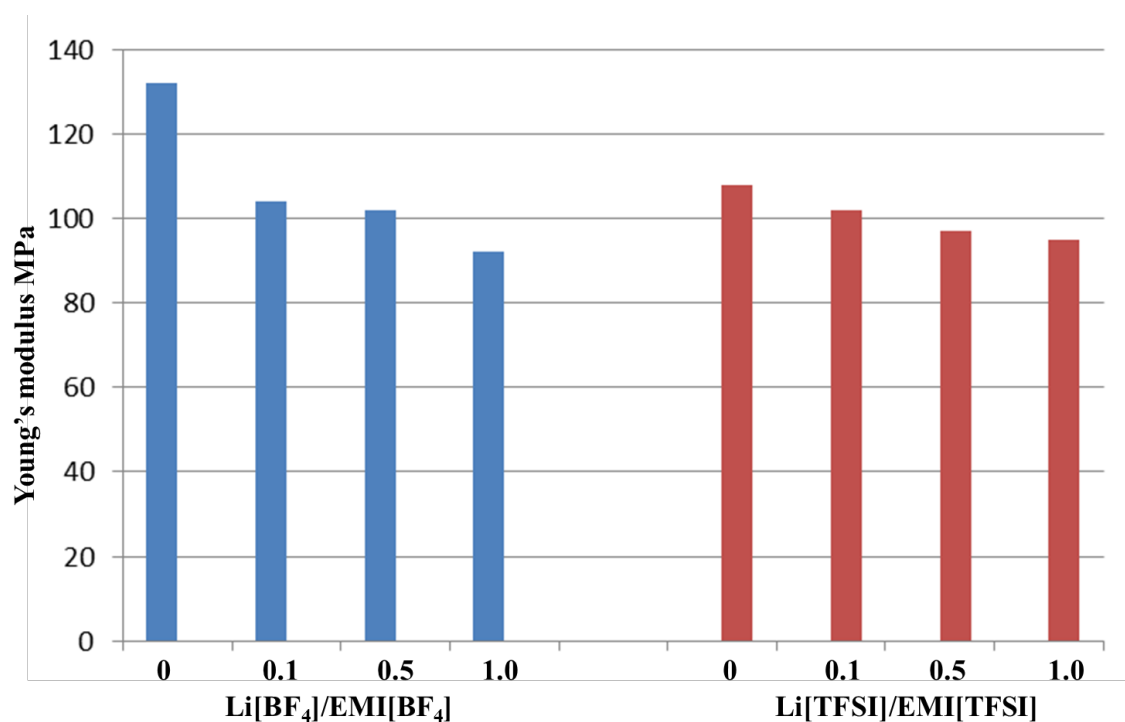

**Fig. S3** Young's modulus (MPa) for electrode layers with different Li[BF<sub>4</sub>]/EMI[BF<sub>4</sub>] and Li[TFSI]/EMI[TFSI] molar ratios.

**Table S1** Simulation parameters.

| Li[X]/<br>EMI[X] = 1 | $C$ (F g <sup>-1</sup> ) | $C$ (F cm <sup>-2</sup> ) | $\kappa$ (mS cm <sup>-1</sup> ) | $R$ ( $\Omega$ cm <sup>2</sup> ) | $\varepsilon_0$ (%) | $CR$ (s) |
|----------------------|--------------------------|---------------------------|---------------------------------|----------------------------------|---------------------|----------|
| [BF <sub>4</sub> ]   | 42.2                     | 0.0237                    | 2.8                             | 0.714                            | 0.37                | 0.0169   |
| [TFSI]               | 20.9                     | 0.0102                    | 1.2                             | 1.669                            | 0.38                | 0.0170   |

**Table S2** Simulation parameters considering electrode resistance.

| <b>Li[X]/<br/>EMI[X] = 1</b> | <b><i>C</i> (F cm<sup>-2</sup>)</b> | <b><i>R<sub>el</sub></i> (Ω cm<sup>2</sup>)</b> | <b><i>R+R<sub>el</sub></i> (Ω cm<sup>2</sup>)</b> | <b><i>C(R+R<sub>el</sub>)</i> (s)</b> |
|------------------------------|-------------------------------------|-------------------------------------------------|---------------------------------------------------|---------------------------------------|
| <b>[BF<sub>4</sub>]</b>      | <b>0.0237</b>                       | <b>20.08</b>                                    | <b>20.79</b>                                      | <b>0.493</b>                          |
| <b>[TFSI]</b>                | <b>0.0102</b>                       | <b>64.10</b>                                    | <b>65.77</b>                                      | <b>0.671</b>                          |
